# Supplementary material for: Transcriptome analysis of the red marine alga Gracilaria vermiculophylla grown under different light intensities
Source: Research Square preprint supplement (doi:10.21203/rs.3.rs-6616872/v1), 2025-05-15
Supplement: Supplementary file 1 [file 49464751ad62be5474d8da08.xlsx]

## Sheet: Sheet1
TableS2 List of upregulated DEGs under different light intensities in G. vermiculophylla
Query Sequence	Description	logFC	FDR
TRINITY_DN15504_c0_g1_i1	PXF39442.1 hypothetical protein BWQ96_10872 [Gracilariopsis chorda]	8.1699	0.000636984
TRINITY_DN2981_c0_g1_i1	KAI0559530.1 nitrate reductase [Gracilaria domingensis]	7.4623	5.86199e-15
TRINITY_DN19587_c0_g1_i2	PXF43233.1 Beta-glucanase [Gracilariopsis chorda]family 16 glycosylhydrolase	6.49966	0.000261041
TRINITY_DN30102_c0_g1_i1	PXF45056.1 hypothetical protein BWQ96_05197 [Gracilariopsis chorda]	5.87408	5.30614e-20
TRINITY_DN1297_c0_g3_i1	KAI0562649.1 Plexin [Gracilaria domingensis IPT/TIG domain-containing protein	5.83047	1.24832e-09
TRINITY_DN57395_c0_g1_i1	PXF45057.1 hypothetical protein BWQ96_05198 [Gracilariopsis chorda]	5.77894	6.22282e-38
TRINITY_DN12418_c0_g1_i1	XP_018289837.1 hypothetical protein PHYBLDRAFT_159345 [Phycomyces blakesleeanus NRRL 1555(-)]	5.7604	0.0379107
TRINITY_DN4426_c0_g1_i1	KAF0708052.1 hypothetical protein AaE_013371, partial [Aphanomyces astaci]	5.70993	0.000838812
TRINITY_DN1679_c0_g1_i1	XP_004337970.1 CBS domain containing protein [Acanthamoeba castellanii str. Neff]	5.7081	9.60076e-06
TRINITY_DN19_c0_g1_i2	Ammonium Transporter KAI0566162.1 Ammonium/urea transporter [Gracilaria domingensis]	4.51246	4.85401e-38
TRINITY_DN40000_c0_g1_i1	XP_004338771.1 CBS domain containing protein [Acanthamoeba castellanii str. Neff]	4.43775	0.01692
TRINITY_DN1297_c0_g2_i1	KAI0562649.1 Plexin [Gracilaria domingensis]	4.07226	7.16218e-08
TRINITY_DN8105_c0_g1_i1	XP_004334732.1 CBS domain containing protein [Acanthamoeba castellanii str. Neff]	3.67093	0.0040423
TRINITY_DN619_c0_g3_i1	MCH2044717.1 class I SAM-dependent methyltransferase [Saprospiraceae bacterium]	3.60865	5.86199e-15
TRINITY_DN33786_c0_g1_i1	KAI0559909.1 Ubiquitin-like protein [Gracilaria domingensis]	3.56136	0.000197346
TRINITY_DN2330_c0_g1_i3	KAI0557315.1 glycosyl transferase family protein [Gracilaria domingensis]	3.37686	2.64846e-09
TRINITY_DN55795_c0_g1_i1	caronic anhyrasePXF45959.1 Bifunctional monodehydroascorbate reductase and carbonic anhydrase nectarin-3 [Gracilariopsis chorda]	3.31303	2.10456e-07
TRINITY_DN68_c0_g1_i1	PXF40522.1 Triose phosphate/phosphate translocator, chloroplastic [Gracilariopsis chorda]	3.24067	3.63886e-05
TRINITY_DN2096_c1_g1_i2	KAI0567254.1 hypothetical protein FGB62_3g225 [Gracilaria domingensis]	3.23876	2.97245e-06
TRINITY_DN546_c0_g1_i2	PXF43103.1 hypothetical protein BWQ96_07189 [Gracilariopsis chorda]	3.22386	1.07865e-26
TRINITY_DN26404_c0_g1_i1	XP_004348347.1 CBS domain containing protein [Acanthamoeba castellanii str. Neff]	3.19319	0.0160988
TRINITY_DN64501_c0_g1_i1	KAI0560378.1 Glycosyl transferase family 11 [Gracilaria domingensis]	3.17361	0.00911513
TRINITY_DN2008_c0_g1_i2	KAI0559044.1 hypothetical protein FGB62_169g014 [Gracilaria domingensis]	3.15279	9.12911e-08
TRINITY_DN55881_c0_g1_i1	MBA3468387.1 peptidoglycan-binding protein [Herpetosiphonaceae bacterium]	3.0152	0.0198376
TRINITY_DN21276_c0_g1_i1	PXF42920.1 Transcription factor MYB44 [Gracilariopsis chorda]	2.81688	0.0297727
TRINITY_DN970_c1_g1_i2	PXF39646.1 hypothetical protein BWQ96_10656 [Gracilariopsis chorda]	2.57553	0.000125107
TRINITY_DN56713_c0_g1_i1	MBK8835675.1 fasciclin domain-containing protein [Anaerolineae bacterium]	2.5519	0.0125297
TRINITY_DN29682_c0_g1_i1	KAI0557714.1 Nucleotide-diphospho-sugar transferase [Gracilaria domingensis]	2.49747	0.00306291
TRINITY_DN17557_c0_g1_i1	PXF46426.1 8-oxoguanine deaminase [Gracilariopsis chorda]	2.48562	0.00805489
TRINITY_DN12409_c0_g1_i1	KAG0271565.1 ATP-binding cassette sub- A member 1 [Linnemannia exigua]	2.43496	0.0377512
TRINITY_DN63904_c0_g1_i1	MBI4338903.1 MIP family channel protein [Chloroflexi bacterium]aquaporin	2.43004	0.0489862
TRINITY_DN305_c0_g1_i7	KAI0566992.1 NAD-dependent epimerase/dehydratase [Gracilaria domingensis]	2.31554	2.72525e-23
TRINITY_DN56666_c0_g1_i1	KAI0560756.1 hypothetical protein FGB62_101g05 [Gracilaria domingensis]	2.27365	0.0152485
TRINITY_DN10866_c0_g1_i1	PXF41958.1 hypothetical protein BWQ96_08312 [Gracilariopsis chorda]	2.18425	0.0199238
TRINITY_DN63863_c0_g1_i1	XP_012758246.1 hypothetical protein SAMD00019534_008250 [Acytostelium subglobosum LB1]	2.07827	0.0433043
TRINITY_DN1697_c0_g1_i2	PXF46107.1 hypothetical protein BWQ96_04113 [Gracilariopsis chorda]	1.90156	1.98856e-16
TRINITY_DN47203_c0_g1_i1	PXF43110.1 Zinc finger protein OZF [Gracilariopsis chorda]	1.82006	0.0148559
TRINITY_DN11918_c0_g1_i1	PXF45935.1 FAD-linked oxidoreductase ZEB1 [Gracilariopsis chorda]	1.77802	0.000177135
TRINITY_DN31252_c0_g1_i1	KAI0567835.1 Cysteine-rich secretory protein [Gracilaria domingensis]	1.72637	0.00255261
TRINITY_DN4090_c0_g1_i1	KAI0562992.1 Cofilin/tropomyosin-type actin-binding protein [Gracilaria domingensis]	1.70643	5.50257e-19
TRINITY_DN29630_c0_g1_i1	PXF49607.1 hypothetical protein BWQ96_00677 [Gracilariopsis chorda]	1.67196	0.0300773
TRINITY_DN3964_c0_g1_i1	PXF49990.1 hypothetical protein BWQ96_00150 [Gracilariopsis chorda]	1.59737	4.82262e-05
TRINITY_DN14690_c0_g1_i1	PXF40280.1 hypothetical protein BWQ96_10013 [Gracilariopsis chorda]	1.54193	0.00672434
TRINITY_DN1713_c0_g1_i1	PXF40814.1 Structural maintenance of chromosomes protein 4 [Gracilariopsis chorda]	1.53161	1.26991e-09
TRINITY_DN21535_c0_g1_i1	XP_004993444.1 uncharacterized protein PTSG_05576 [Salpingoeca rosetta]	1.38955	0.0213586
TRINITY_DN46783_c0_g1_i1	PXF49715.1 hypothetical protein BWQ96_00367 [Gracilariopsis chorda]	1.33225	0.000338048
TRINITY_DN412_c1_g1_i1	KAI0563899.1 hypothetical protein FGB62_32g021 [Gracilaria domingensis]	1.27601	9.7156e-06
TRINITY_DN64343_c0_g1_i1	XP_004995541.1 uncharacterized protein PTSG_03808 [Salpingoeca rosetta]	1.21813	0.037566
TRINITY_DN2896_c0_g1_i1	KAI0566271.1 Glucose-methanol-choline oxidoreductase [Gracilaria domingensis]	1.20903	1.07203e-08
TRINITY_DN6298_c0_g1_i1	PXF40214.1 hypothetical protein BWQ96_10077 [Gracilariopsis chorda]	1.09314	0.0367014
TRINITY_DN1201_c0_g1_i2	KAI0563384.1 hypothetical protein FGB62_40g175 [Gracilaria domingensis]	1.08217	0.0317093
TRINITY_DN55338_c0_g1_i1	KAI0563219.1 HSP90 [Gracilaria domingensis]	1.08182	4.61631e-06
TRINITY_DN47121_c0_g1_i1	PXF43274.1 hypothetical protein BWQ96_07001 [Gracilariopsis chorda]	1.04401	4.82262e-05
TRINITY_DN66271_c0_g1_i1	PXF44916.1 hypothetical protein BWQ96_05336 [Gracilariopsis chorda]	1.03444	0.0456729
TRINITY_DN3619_c0_g1_i1	KAI0566170.1 presequence protease [Gracilaria domingensis]	1.0253	5.03949e-12
TRINITY_DN1276_c0_g1_i3	KAI0558784.1 chymotrypsin-like elastase family member 2A [Gracilaria domingensis]	1.01585	0.00973812
