# Supplementary material for: Transcriptome analysis of the red marine alga Gracilaria vermiculophylla grown under different light intensities
Source: Research Square preprint supplement (doi:10.21203/rs.3.rs-6616872/v1), 2025-05-15
Supplement: Supplementary file 2 [file 6420f8075f27e617943f7ab2.xlsx]

## Sheet: Sheet1
Table S1. The list of primers used for gene expression analysis by Real Time PCR in G. vermiculophylla
Primer name Contig ID Sequence (5’-3’)
18SrRNA-F1		KC577226*			TTGGCTTACCATGGTTGTGA
18SrRNA-R1		KC577226*			TGGCTCCTCGATAAGCTGTT
DN2981-F1		DN2981_c0_g1_i1			TTCTTTTTGGACCGGTGTTC
DN2981-R1		DN2981_c0_g1_i1			AATGGCTTCCGTTTTGTTTG
DN19-F1		DN19_c0_g1_i2			ATTTGGTGCAGGGTCAACTC
DN19-R1		DN19_c0_g1_i2			GCGAGGATTGATGGTTTTGT
DN55795-F1		DN55795_c0_g1_i1			CCAGCCTCTCTCTCTGCACT
DN55795-R1		DN55795_c0_g1_i1			ATATGCCGTGGACGATTCTC
