# Supplementary material for: Transcriptome analysis of the red marine alga Gracilaria vermiculophylla grown under different light intensities
Source: Research Square preprint supplement (doi:10.21203/rs.3.rs-6616872/v1), 2025-05-15
Supplement: Supplementary file 3 [file 8345ae926aecf122cea1963d.xlsx]

## Sheet: Sheet1
TableS3 List of downregulated DEGs under different light intensities in G. vermiculophylla
Query Sequence	Description	logFC	FDR
TRINITY_DN21154_c0_g1_i1	CAE7649686.1 DPL1 [Symbiodinium sp. KB8]	-6.98368	0.000621214
TRINITY_DN20191_c0_g1_i1	KAG6957969.1 hypothetical protein JG687_00009667 [Phytophthora cactorum]	-6.82333	2.10207e-05
TRINITY_DN3726_c0_g1_i1	CAE7741717.1 GPD [Symbiodinium sp. KB8]	-6.76235	8.93897e-05
TRINITY_DN1533_c0_g1_i1	KAA0147844.1 hypothetical protein FNF29_07058 [Cafeteria roenbergensis]	-6.4567	5.99716e-08
TRINITY_DN11594_c0_g2_i1	CAE6922663.1 Acly [Symbiodinium sp. KB8]	-6.35291	0.0125297
TRINITY_DN65230_c0_g1_i1	KAA0174350.1 hypothetical protein FNF27_04142 [Cafeteria roenbergensis]	-6.33296	0.00352859
TRINITY_DN10208_c0_g1_i1	CAE7914721.1 NME7 [Symbiodinium sp. KB8]	-6.31586	0.00653329
TRINITY_DN64260_c0_g1_i1	XP_031571571.1 squamous cell carcinoma antigen recognized by T-cells 3-like [Actinia tenebrosa]	-6.20629	0.00380851
TRINITY_DN58158_c0_g1_i1	CAE7808360.1 acad8 [Symbiodinium sp. KB8]	-6.19499	0.0123521
TRINITY_DN47767_c0_g1_i1	XP_001419601.1 predicted protein [Ostreococcus lucimarinus CCE9901]	-6.17105	0.00566359
TRINITY_DN32697_c0_g1_i1	CAF0851969.1 unnamed protein product [Adineta steineri]	-6.14745	0.00300206
TRINITY_DN21224_c0_g1_i1	KAA0152673.1 hypothetical protein FNF31_06577 [Cafeteria roenbergensis]	-6.1454	0.00532857
TRINITY_DN22418_c0_g1_i1	CAE7259194.1 gny [Symbiodinium sp. KB8]	-6.0233	0.00255619
TRINITY_DN11749_c0_g1_i1	KAA0176951.1 hypothetical protein FNF27_01773 [Cafeteria roenbergensis]	-5.9158	0.0189642
TRINITY_DN7824_c0_g1_i1	CAE7891824.1 kel, partial [Symbiodinium sp. KB8]	-5.90158	0.0125297
TRINITY_DN68835_c0_g1_i1	CAE7331114.1 Grsf1 [Symbiodinium sp. KB8]	-5.87995	0.00532857
TRINITY_DN21671_c0_g1_i1	CAE7567519.1 rpsE, partial [Symbiodinium sp. KB8]	-5.79259	0.0158901
TRINITY_DN3179_c0_g1_i1	KAA6368175.1 putative dynein heavy chain [Streblomastix strix]	-5.77788	0.0112347
TRINITY_DN19539_c0_g1_i1	CAE7831334.1 mmcm6 [Symbiodinium sp. KB8]	-5.77765	0.0230404
TRINITY_DN14006_c0_g1_i1	CAE7525083.1 PRC1 [Symbiodinium sp. KB8]	-5.71165	0.0432151
TRINITY_DN3126_c0_g1_i1	CAE7378380.1 unnamed protein product [Symbiodinium sp. KB8]	-5.64215	0.0288385
TRINITY_DN19920_c0_g1_i1	CAE7940926.1 YCHF1 [Symbiodinium sp. KB8]	-5.44262	4.12825e-05
TRINITY_DN30479_c0_g1_i1	KAA0147005.1 hypothetical protein FNF29_07632 [Cafeteria roenbergensis]	-5.30999	0.000348871
TRINITY_DN2822_c0_g1_i1	XP_013759650.1 antigen KI-67, variant [Thecamonas trahens ATCC 50062]	-5.08977	0.00105035
TRINITY_DN960_c0_g2_i1	XP_024578943.1 small nuclear ribonucleoprotein g [Plasmopara halstedii]	-4.99813	0.000400638
TRINITY_DN43968_c0_g1_i1	KAA0156031.1 hypothetical protein FNF29_01449 [Cafeteria roenbergensis]	-4.84587	0.00101472
TRINITY_DN48491_c0_g1_i1	CAE7921786.1 AIP3, partial [Symbiodinium sp. KB8]	-4.79144	0.001169
TRINITY_DN3991_c0_g1_i1	XP_024585790.1 26s protease regulatory subunit 10b [Plasmopara halstedii]	-4.7129	0.00392786
TRINITY_DN8755_c0_g1_i1	CAE7257286.1 smc2 [Symbiodinium sp. KB8]	-4.68641	4.90785e-06
TRINITY_DN11559_c0_g1_i1	KAG3116595.1 Dolichol-phosphate mannosyltransferase subunit 1 [Phytophthora idaei]	-4.66811	0.00393437
TRINITY_DN67948_c0_g1_i1	CAE7366118.1 ERH, partial [Symbiodinium sp. KB8]	-4.54978	0.0032376
TRINITY_DN2279_c0_g2_i1	KAA0153558.1 hypothetical protein FNF29_02947 [Cafeteria roenbergensis]	-4.51719	3.36791e-06
TRINITY_DN55987_c0_g1_i1	CAE7354163.1 EIF3F [Symbiodinium sp. KB8]	-4.45546	0.0156067
TRINITY_DN9194_c0_g1_i1	KAA0154646.1 hypothetical protein FNF29_02177 [Cafeteria roenbergensis]	-4.43014	0.0212828
TRINITY_DN585_c11_g1_i1	QWE91208.1 heat shock protein 70 [Placidida sp.]	-4.36594	0.000156857
TRINITY_DN21388_c0_g1_i1	CAE7659615.1 unnamed protein product, partial [Symbiodinium sp. KB8]	-4.35726	0.00913971
TRINITY_DN3392_c0_g1_i1	CAE7275821.1 PA2G4 [Symbiodinium sp. KB8]	-4.3514	0.000361336
TRINITY_DN33766_c0_g1_i1	KAA0155921.1 hypothetical protein FNF29_01340 [Cafeteria roenbergensis]	-4.32504	0.000348714
TRINITY_DN11895_c0_g1_i1	XP_004352778.1 3hydroxyisobutyrate dehydrogenase [Acanthamoeba castellanii str. Neff]	-4.32126	0.0077422
TRINITY_DN12122_c0_g1_i1	CAE7473915.1 auh [Symbiodinium sp. KB8]	-4.30644	0.0206771
TRINITY_DN41280_c0_g1_i1	KAA0153025.1 hypothetical protein FNF29_03545 [Cafeteria roenbergensis]	-4.2933	0.0164585
TRINITY_DN49215_c0_g1_i1	CUG91785.1 asparate peptidase, putative [Bodo saltans]	-4.21541	0.0125297
TRINITY_DN1207_c0_g2_i1	KAA0148005.1 hypothetical protein FNF29_06949 [Cafeteria roenbergensis]	-4.21495	1.58998e-06
TRINITY_DN6523_c0_g1_i1	CAE7947054.1 RRP5 [Symbiodinium sp. KB8]	-4.10919	0.0421633
TRINITY_DN48372_c0_g1_i1	CAE7344091.1 Morn2 [Symbiodinium sp. KB8]	-4.10914	0.028618
TRINITY_DN18007_c0_g1_i2	KAG5180276.1 HSF-type DNA-binding-domain-containing protein, partial [Tribonema minus]	-4.09599	0.0292762
TRINITY_DN13623_c0_g1_i1	CAE7403369.1 ALA3, partial [Symbiodinium sp. KB8]	-4.09552	0.0150791
TRINITY_DN19736_c0_g1_i1	CAE7844816.1 SAE2 [Symbiodinium sp. KB8]	-4.0908	0.0453771
TRINITY_DN12247_c0_g1_i2	CAE7892001.1 psmD3 [Symbiodinium sp. KB8]	-4.05702	0.000914666
TRINITY_DN18417_c0_g1_i1	CAE7286477.1 Nca, partial [Symbiodinium sp. KB8]	-4.04919	0.0230404
TRINITY_DN12455_c0_g1_i1	CAE7347280.1 puf, partial [Symbiodinium sp. KB8]	-4.0471	0.0459539
TRINITY_DN14584_c0_g1_i1	CAE7864054.1 KPNB1, partial [Symbiodinium sp. KB8]	-4.0366	0.0151194
TRINITY_DN2882_c0_g1_i1	CCI48670.1 unnamed protein product [Albugo candida]	-4.0082	0.000651453
TRINITY_DN15592_c0_g1_i1	CAC5369565.1 SMC4 [Mytilus coruscus]	-3.98719	0.000304835
TRINITY_DN5389_c0_g1_i1	KAA0153003.1 hypothetical protein FNF29_03523 [Cafeteria roenbergensis]	-3.9845	0.0085631
TRINITY_DN65767_c0_g1_i1	KAA0177542.1 hypothetical protein FNF27_00712 [Cafeteria roenbergensis]	-3.98101	0.00434799
TRINITY_DN19796_c0_g1_i1	CAE7249335.1 atad3 [Symbiodinium sp. KB8]	-3.97934	0.00951978
TRINITY_DN40085_c0_g1_i1	CAE7245866.1 CAPS [Symbiodinium sp. KB8]	-3.97389	0.00796822
TRINITY_DN5806_c0_g1_i1	CAE7912447.1 MTARC1, partial [Symbiodinium sp. KB8]	-3.97218	0.000151124
TRINITY_DN13207_c0_g1_i1	PXF41248.1 T-cell immunomodulatory protein [Gracilariopsis chorda]	-3.92944	0.0389896
TRINITY_DN40510_c0_g1_i1	CAE7754898.1 AAPT1, partial [Symbiodinium sp. KB8]	-3.92252	0.0239286
TRINITY_DN11823_c0_g1_i1	KAA0145772.1 hypothetical protein FNF28_07802 [Cafeteria roenbergensis]	-3.91953	0.030948
TRINITY_DN65238_c0_g1_i1	CAE7692050.1 unnamed protein product [Symbiodinium sp. KB8]	-3.91752	0.020022
TRINITY_DN25355_c0_g1_i1	CAE7886118.1 Xpo7, partial [Symbiodinium sp. KB8]	-3.91627	0.020022
TRINITY_DN4651_c0_g1_i2	CAE7903607.1 CETN2, partial [Symbiodinium sp. KB8]	-3.85663	0.0161904
TRINITY_DN15846_c0_g1_i1	CAE7497266.1 CBR2 [Symbiodinium sp. KB8]	-3.84026	0.00655972
TRINITY_DN20760_c0_g1_i1	CAE7437525.1 unnamed protein product [Symbiodinium sp. KB8]	-3.83674	0.00973812
TRINITY_DN2580_c3_g1_i1	KAA0146366.1 hypothetical protein FNF29_08097 [Cafeteria roenbergensis]	-3.81844	0.00211452
TRINITY_DN19679_c0_g1_i1	CAE7267373.1 unnamed protein product [Symbiodinium sp. KB8]	-3.81785	0.0036551
TRINITY_DN66156_c0_g1_i1	KAA0147954.1 hypothetical protein FNF29_07043 [Cafeteria roenbergensis]	-3.81707	0.000361336
TRINITY_DN5991_c0_g1_i1	KAA0157117.1 hypothetical protein FNF29_00469 [Cafeteria roenbergensis]	-3.81626	0.0107513
TRINITY_DN3998_c0_g1_i1	CAE7547072.1 Cstb, partial [Symbiodinium sp. KB8]	-3.80669	0.0162564
TRINITY_DN40572_c0_g1_i1	CAE7223203.1 fps [Symbiodinium sp. KB8]	-3.80596	0.0014681
TRINITY_DN23829_c0_g1_i1	CAE7602072.1 EIF6-2, partial [Symbiodinium sp. KB8]	-3.77082	0.00703311
TRINITY_DN41792_c0_g1_i1	CAE7253517.1 Alox5 [Symbiodinium sp. KB8]	-3.76713	0.000914666
TRINITY_DN31331_c0_g1_i1	CAE7381752.1 Fib [Symbiodinium sp. KB8]	-3.76697	0.00122487
TRINITY_DN57455_c0_g1_i1	KAA0148422.1 hypothetical protein FNF29_06640 [Cafeteria roenbergensis]	-3.75852	8.81372e-05
TRINITY_DN40037_c0_g1_i1	CAE7382320.1 RIBC1, partial [Symbiodinium sp. KB8]	-3.73952	0.0324142
TRINITY_DN64857_c0_g1_i1	CAE7392965.1 unnamed protein product [Symbiodinium sp. KB8]	-3.70694	0.00796822
TRINITY_DN12284_c0_g1_i1	CAE7780094.1 Pacrg [Symbiodinium sp. KB8]	-3.70592	0.00332349
TRINITY_DN10887_c0_g1_i1	CAE7222445.1 Eif2s3y [Symbiodinium sp. KB8]	-3.69424	0.00255261
TRINITY_DN30412_c0_g1_i1	CAE7583354.1 ddx1, partial [Symbiodinium sp. KB8]	-3.68409	0.0291278
TRINITY_DN5861_c0_g1_i1	CAE7941976.1 HSP70-17, partial [Symbiodinium sp. KB8]	-3.68004	0.00472413
TRINITY_DN2727_c0_g1_i1	XP_008864063.1 hypothetical protein H310_02356 [Aphanomyces invadans]	-3.66952	0.000318611
TRINITY_DN4607_c0_g1_i1	KAA0146433.1 hypothetical protein FNF29_08050 [Cafeteria roenbergensis]	-3.65675	0.00355487
TRINITY_DN14065_c0_g1_i1	EFH58747.1 AT-IMP [Arabidopsis lyrata subsp. lyrata]	-3.6548	0.00252589
TRINITY_DN7769_c0_g1_i1	CAE7520818.1 unnamed protein product [Symbiodinium sp. KB8]	-3.65383	0.00395675
TRINITY_DN4394_c0_g1_i2	CDW88999.1 alpha--mannosyl-glycoprotein beta-2-n- [Stylonychia lemnae]	-3.65183	0.00141564
TRINITY_DN52192_c0_g1_i1	CAE7518708.1 unnamed protein product, partial [Symbiodinium sp. KB8]	-3.63751	0.000304835
TRINITY_DN3202_c0_g1_i1	CAE7937814.1 unnamed protein product [Symbiodinium sp. KB8]	-3.629	0.00808126
TRINITY_DN14094_c0_g1_i1	CAE7648685.1 unnamed protein product [Symbiodinium sp. KB8]	-3.61999	0.00600858
TRINITY_DN6961_c0_g1_i1	CAE7947666.1 ube2m [Symbiodinium sp. KB8]	-3.5478	0.00122487
TRINITY_DN5974_c0_g1_i1	KAA0147600.1 hypothetical protein FNF29_07247 [Cafeteria roenbergensis]	-3.5466	0.000838812
TRINITY_DN6880_c0_g1_i1	RYG39934.1 ankyrin repeat domain-containing protein, partial [archaeon]	-3.54317	0.0325198
TRINITY_DN1976_c0_g1_i1	CAE7267397.1 HMGB4 [Symbiodinium sp. KB8]	-3.53953	0.0148559
TRINITY_DN12181_c0_g2_i1	CAE7264521.1 nprt-1 [Symbiodinium sp. KB8]	-3.53815	0.00169812
TRINITY_DN34600_c0_g1_i1	CAE7311912.1 dync2li1 [Symbiodinium sp. KB8]	-3.52849	0.0167749
TRINITY_DN15015_c0_g1_i1	CAE7386332.1 ABCI20 [Symbiodinium sp. KB8]	-3.51953	0.0262936
TRINITY_DN22443_c0_g1_i1	CAE7948296.1 Xrn1 [Symbiodinium sp. KB8]	-3.51103	0.0040423
TRINITY_DN31422_c0_g1_i1	KAA0146935.1 hypothetical protein FNF29_07739 [Cafeteria roenbergensis]	-3.50483	0.00128462
TRINITY_DN6894_c0_g1_i1	RYY38323.1 hypothetical protein EON62_00490, partial [archaeon]	-3.48434	0.0032376
TRINITY_DN7893_c0_g1_i1	CAE7296754.1 H1A, partial [Symbiodinium sp. KB8]	-3.46738	0.000994993
TRINITY_DN29945_c0_g1_i1	XP_011402404.1 Cob(I)yrinic acid a,c-diamide adenosyltransferase, mitochondrial [Auxenochlorella protothecoides]	-3.44715	0.0103103
TRINITY_DN11281_c0_g1_i1	CAE6968547.1 Ipo5 [Symbiodinium sp. KB8]	-3.43194	0.0292005
TRINITY_DN8186_c0_g1_i1	KAH8045836.1 hypothetical protein JL722_13992 [Aureococcus anophagefferens]	-3.41393	0.0253445
TRINITY_DN64907_c0_g1_i1	GBG32729.1 Methylenetetrahydrofolate reductase 1 [Hondaea fermentalgiana]	-3.41216	0.0202895
TRINITY_DN51029_c0_g1_i1	CAE7248827.1 unnamed protein product [Symbiodinium sp. KB8]	-3.40255	0.00914804
TRINITY_DN10037_c0_g1_i1	CAE7784402.1 TMEM43, partial [Symbiodinium sp. KB8]	-3.38908	0.00412554
TRINITY_DN4531_c1_g1_i1	CAE7844818.1 Rnh1, partial [Symbiodinium sp. KB8]	-3.38022	0.0364146
TRINITY_DN14648_c0_g1_i1	CAE7946131.1 cspC [Symbiodinium sp. KB8]	-3.37177	0.0103115
TRINITY_DN34080_c0_g1_i1	KAH7471110.1 Protein BUD31-like protein [Phytophthora ramorum]	-3.36267	0.0359823
TRINITY_DN30998_c0_g1_i1	CAE7939176.1 unnamed protein product, partial [Symbiodinium sp. KB8]	-3.35896	0.0455091
TRINITY_DN48498_c0_g1_i1	CAE7938049.1 CML21 [Symbiodinium sp. KB8]	-3.35779	0.00155673
TRINITY_DN66025_c0_g1_i1	CAE7467043.1 RPN8B, partial [Symbiodinium sp. KB8]	-3.3484	0.0032376
TRINITY_DN5567_c0_g2_i1	CAE7723790.1 unnamed protein product [Symbiodinium sp. KB8]	-3.34415	0.00676458
TRINITY_DN10772_c0_g1_i1	KAA0153389.1 hypothetical protein FNF29_03206 [Cafeteria roenbergensis]	-3.32936	0.000276458
TRINITY_DN6036_c0_g1_i1	XP_008864077.1 hypothetical protein H310_02370 [Aphanomyces invadans]	-3.32721	0.0115039
TRINITY_DN7781_c0_g1_i1	CAE7874104.1 unnamed protein product [Symbiodinium sp. KB8]	-3.31623	0.00609693
TRINITY_DN12432_c0_g1_i1	KAA0158603.1 hypothetical protein FNF31_05354 [Cafeteria roenbergensis]	-3.30975	0.0220342
TRINITY_DN39065_c0_g1_i1	CAE7400308.1 ARL3 [Symbiodinium sp. KB8]	-3.30517	0.000261041
TRINITY_DN13701_c0_g1_i1	CAE7811182.1 hh2b [Symbiodinium sp. KB8]	-3.29931	0.0413083
TRINITY_DN15528_c0_g1_i1	CAE7684790.1 RHM2, partial [Symbiodinium sp. KB8]	-3.29208	0.0102291
TRINITY_DN23731_c0_g1_i1	CAE7714166.1 pccA, partial [Symbiodinium sp. KB8]	-3.2837	0.000651453
TRINITY_DN18422_c0_g1_i1	CBN75348.1 Valine--tRNA ligase [Ectocarpus siliculosus]	-3.27421	0.0325198
TRINITY_DN15628_c0_g1_i1	CAE7357953.1 SFC1, partial [Symbiodinium sp. KB8]	-3.27139	0.00960547
TRINITY_DN12510_c0_g1_i2	CAE7512060.1 Spag6, partial [Symbiodinium sp. KB8]	-3.25832	0.001169
TRINITY_DN30663_c0_g1_i1	CAE7260338.1 Capsl [Symbiodinium sp. KB8]	-3.25654	0.00179076
TRINITY_DN55616_c0_g1_i1	KAA0160778.1 hypothetical protein FNF31_04161 [Cafeteria roenbergensis]	-3.25636	0.020022
TRINITY_DN23329_c0_g1_i1	CAE7866724.1 PAD1 [Symbiodinium sp. KB8]	-3.25226	0.000234095
TRINITY_DN55246_c0_g1_i1	MBN8530445.1 AMP-binding protein [Alphaproteobacteria bacterium]	-3.2496	0.00720228
TRINITY_DN35302_c0_g1_i1	KAF0726696.1 hypothetical protein Ae201684_015095 [Aphanomyces euteiches]	-3.24514	0.036597
TRINITY_DN32275_c0_g1_i1	PRP78865.1 hypothetical protein PROFUN_01038 [Planoprotostelium fungivorum]	-3.24405	0.0450852
TRINITY_DN49739_c0_g1_i1	MBL9043546.1 hypothetical protein [Myxococcales bacterium]	-3.23742	0.00796822
TRINITY_DN2848_c0_g1_i1	CAE6939252.1 eRF1 [Symbiodinium sp. KB8]	-3.23229	0.00969738
TRINITY_DN38424_c0_g1_i1	CAE7690084.1 CCT7, partial [Symbiodinium sp. KB8]	-3.22799	0.00441174
TRINITY_DN66964_c0_g1_i1	CAE7285377.1 CKS2 [Symbiodinium sp. KB8]	-3.22615	0.00644956
TRINITY_DN16053_c0_g1_i1	CAE7833826.1 Rpn1 [Symbiodinium sp. KB8]	-3.22159	0.00127674
TRINITY_DN20553_c0_g1_i1	CAE7353441.1 csn6 [Symbiodinium sp. KB8]	-3.20283	0.035667
TRINITY_DN55572_c0_g1_i1	CAE7223828.1 rsph9 [Symbiodinium sp. KB8]	-3.20067	0.00263153
TRINITY_DN5372_c0_g1_i1	CAE7240826.1 CANT1 [Symbiodinium sp. KB8]	-3.18183	0.0156316
TRINITY_DN3347_c0_g1_i3	ACO10257.1 Histone H1-delta [Caligus rogercresseyi]	-3.17737	0.000360195
TRINITY_DN1300_c0_g2_i1	KAA0150089.1 hypothetical protein FNF29_05529 [Cafeteria roenbergensis]	-3.15508	0.000378875
TRINITY_DN6850_c0_g1_i1	CAE7271450.1 NDPK3 [Symbiodinium sp. KB8]	-3.15037	0.00168581
TRINITY_DN2502_c1_g1_i1	CAE7187994.1 CCT2 [Symbiodinium sp. KB8]	-3.1456	0.00168235
TRINITY_DN57578_c0_g1_i1	CAE7812582.1 empA [Symbiodinium sp. KB8]	-3.13873	0.00206618
TRINITY_DN7851_c0_g1_i1	CAE7305732.1 unnamed protein product [Symbiodinium sp. KB8]	-3.13871	0.00045862
TRINITY_DN7555_c0_g1_i1	KAA0175636.1 hypothetical protein FNF27_02718 [Cafeteria roenbergensis]	-3.13705	0.008291
TRINITY_DN29901_c0_g1_i1	CAE7577677.1 UBC1, partial [Symbiodinium sp. KB8]	-3.13615	0.00237123
TRINITY_DN59625_c0_g1_i1	CAE7898694.1 unnamed protein product [Symbiodinium sp. KB8]	-3.1284	0.0381208
TRINITY_DN57657_c0_g1_i1	CAE7649700.1 NSFL1C [Symbiodinium sp. KB8]	-3.12669	0.0474453
TRINITY_DN58577_c0_g1_i1	CAE7454415.1 RPA1C, partial [Symbiodinium sp. KB8]	-3.12454	0.00237123
TRINITY_DN10172_c0_g1_i1	CAE7659950.1 Capsl [Symbiodinium sp. KB8]	-3.11933	0.0112347
TRINITY_DN2063_c0_g1_i2	CAE7817849.1 B'THETA, partial [Symbiodinium sp. KB8]	-3.11755	0.00013168
TRINITY_DN12231_c0_g1_i1	CAE7676018.1 EDA2 [Symbiodinium sp. KB8]	-3.11582	0.0498932
TRINITY_DN9031_c0_g1_i1	KAA0157429.1 hypothetical protein FNF29_00005 [Cafeteria roenbergensis]	-3.10535	0.0329051
TRINITY_DN2564_c0_g1_i1	KAA0148940.1 hypothetical protein FNF31_07299 [Cafeteria roenbergensis]	-3.10281	0.00122487
TRINITY_DN4877_c0_g1_i2	CAE7698136.1 Psmd6, partial [Symbiodinium sp. KB8]	-3.10206	0.00600858
TRINITY_DN11630_c0_g1_i1	CAE7359704.1 unnamed protein product [Symbiodinium sp. KB8]	-3.10111	0.0209356
TRINITY_DN22081_c0_g1_i1	CAE7599585.1 ODA2 [Symbiodinium sp. KB8]	-3.09993	0.0111701
TRINITY_DN3758_c0_g1_i1	CAE7245866.1 CAPS [Symbiodinium sp. KB8]	-3.09406	0.0180541
TRINITY_DN18602_c0_g1_i1	CAE7585271.1 arpc4 [Symbiodinium sp. KB8]	-3.09093	0.0241346
TRINITY_DN9069_c0_g1_i1	CAE7820556.1 unnamed protein product [Symbiodinium sp. KB8]	-3.08908	0.0235297
TRINITY_DN1993_c0_g1_i2	KAA0157340.1 hypothetical protein FNF31_05765 [Cafeteria roenbergensis]	-3.0883	0.0098465
TRINITY_DN63944_c0_g1_i1	CAE7523727.1 arcA [Symbiodinium sp. KB8]	-3.08655	0.00712654
TRINITY_DN6838_c0_g1_i1	CAE7704951.1 PCNA2 [Symbiodinium sp. KB8]	-3.08166	0.00127674
TRINITY_DN40476_c0_g1_i1	CAE7915839.1 unnamed protein product [Symbiodinium sp. KB8]	-3.08094	0.0198801
TRINITY_DN17247_c0_g1_i1	CAE7577664.1 TIF3C1 [Symbiodinium sp. KB8]	-3.07453	0.00214423
TRINITY_DN22690_c0_g1_i1	CAG7819502.1 unnamed protein product [Allacma fusca]	-3.07232	0.0262936
TRINITY_DN19251_c0_g1_i1	CAE7285395.1 unnamed protein product [Symbiodinium sp. KB8]	-3.07034	0.0432151
TRINITY_DN12295_c0_g1_i1	CAE7687101.1 unnamed protein product, partial [Symbiodinium sp. KB8]	-3.07007	0.00655972
TRINITY_DN5227_c0_g1_i2	CAE7900571.1 IGF2BP1, partial [Symbiodinium sp. KB8]	-3.04381	0.00649558
TRINITY_DN5437_c1_g1_i1	CAE7634402.1 unnamed protein product [Symbiodinium sp. KB8]	-3.04232	0.00169316
TRINITY_DN12396_c0_g1_i1	PRP85343.1 hypothetical protein PROFUN_07051 [Planoprotostelium fungivorum]	-3.03441	0.0146298
TRINITY_DN5936_c0_g1_i1	CAE7949019.1 unnamed protein product [Symbiodinium sp. KB8]	-3.03353	0.0329051
TRINITY_DN24733_c0_g1_i1	CAE6939177.1 DRC4 [Symbiodinium sp. KB8]	-3.02954	0.0411343
TRINITY_DN7943_c0_g1_i1	CAE7446925.1 unnamed protein product [Symbiodinium sp. KB8]	-3.02927	0.0274546
TRINITY_DN809_c3_g1_i1	CAE7421285.1 unnamed protein product [Symbiodinium sp. KB8]	-3.02886	0.000139875
TRINITY_DN8331_c3_g1_i1	CAE7404167.1 unnamed protein product [Symbiodinium sp. KB8]	-3.02649	0.00209461
TRINITY_DN30417_c0_g1_i1	CAE7853731.1 vamp7B [Symbiodinium sp. KB8]	-3.01918	0.0098465
TRINITY_DN5158_c0_g1_i2	CAE7251144.1 unnamed protein product [Symbiodinium sp. KB8]	-3.01366	0.0166438
TRINITY_DN19784_c0_g1_i1	CAE7432725.1 cs [Symbiodinium sp. KB8]	-3.01021	0.00600858
TRINITY_DN11276_c0_g1_i1	CAE7892233.1 Dynlt1 [Symbiodinium sp. KB8]	-3.00465	0.0322246
TRINITY_DN55447_c0_g1_i1	CAE7339033.1 rnr-1 [Symbiodinium sp. KB8]	-3.00347	0.00434799
TRINITY_DN7390_c0_g1_i1	CAE7838556.1 pef-1, partial [Symbiodinium sp. KB8]	-3.00282	0.00368465
TRINITY_DN3507_c0_g1_i1	CAE7694588.1 SOD2 [Symbiodinium sp. KB8]	-2.99898	0.000838812
TRINITY_DN38288_c0_g1_i1	CAE7705847.1 unnamed protein product, partial [Symbiodinium sp. KB8]	-2.99867	0.000491177
TRINITY_DN4374_c0_g1_i1	CAE7390715.1 unnamed protein product [Symbiodinium sp. KB8]	-2.99684	0.0032376
TRINITY_DN4334_c0_g1_i1	CAE7943928.1 SLC35D2 [Symbiodinium sp. KB8]	-2.99281	0.0460581
TRINITY_DN66728_c0_g1_i1	CAE7904906.1 HERC1 [Symbiodinium sp. KB8]	-2.98438	0.0151194
TRINITY_DN12250_c0_g1_i1	CAE7875338.1 Ift81, partial [Symbiodinium sp. KB8]	-2.97599	0.0192866
TRINITY_DN39880_c0_g1_i1	CAE7917538.1 unnamed protein product [Symbiodinium sp. KB8]	-2.97421	0.0109524
TRINITY_DN30626_c0_g1_i1	CAE7760072.1 unnamed protein product, partial [Symbiodinium sp. KB8]	-2.97279	0.0210091
TRINITY_DN1437_c0_g1_i1	TFJ84952.1 hypothetical protein NSK_003980 [Nannochloropsis salina CCMP1776]	-2.96483	0.000276458
TRINITY_DN3289_c0_g1_i1	CAE7910479.1 ACA5, partial [Symbiodinium sp. KB8]	-2.96098	0.000889498
TRINITY_DN9397_c0_g1_i1	CAE7521985.1 slc35c1 [Symbiodinium sp. KB8]	-2.94975	0.0357551
TRINITY_DN3322_c0_g1_i1	XP_009032667.1 hypothetical protein AURANDRAFT_19173 [Aureococcus anophagefferens]	-2.94939	0.000599455
TRINITY_DN7975_c0_g1_i1	CAE7331698.1 PMI2 [Symbiodinium sp. KB8]	-2.94759	0.00889115
TRINITY_DN56229_c0_g1_i1	CAE7576060.1 unnamed protein product [Symbiodinium sp. KB8]	-2.94152	0.00882849
TRINITY_DN2693_c0_g1_i1	CAE7404638.1 DBI [Symbiodinium sp. KB8]	-2.93489	0.0159277
TRINITY_DN31161_c0_g1_i1	CAE7306457.1 PAP1 [Symbiodinium sp. KB8]	-2.93402	0.00703311
TRINITY_DN65262_c0_g1_i1	CAE7880548.1 unnamed protein product [Symbiodinium sp. KB8]	-2.93358	0.0262936
TRINITY_DN18045_c0_g1_i1	KAA0149490.1 hypothetical protein FNF29_05876 [Cafeteria roenbergensis]	-2.93048	0.0428782
TRINITY_DN34149_c0_g1_i1	KAI0561740.1 hypothetical protein FGB62_73g14 [Gracilaria domingensis]	-2.92959	0.0111701
TRINITY_DN3273_c0_g2_i1	CAE7356859.1 ATP2B3 [Symbiodinium sp. KB8]	-2.92419	0.00202615
TRINITY_DN5107_c0_g1_i1	CAE7910550.1 CUL1 [Symbiodinium sp. KB8]	-2.922	0.0135931
TRINITY_DN50541_c0_g1_i1	CAE7848770.1 unnamed protein product, partial [Symbiodinium sp. KB8]	-2.91875	0.0157754
TRINITY_DN21774_c0_g1_i1	CAE7695647.1 unnamed protein product [Symbiodinium sp. KB8]	-2.90293	0.00329683
TRINITY_DN8938_c0_g1_i1	CAE7938956.1 unnamed protein product [Symbiodinium sp. KB8]	-2.90242	0.0278326
TRINITY_DN10044_c0_g1_i1	KAA0153776.1 hypothetical protein FNF31_06380 [Cafeteria roenbergensis]	-2.89643	0.0402288
TRINITY_DN3431_c2_g1_i1	TMW55294.1 hypothetical protein Poli38472_013185 [Pythium oligandrum]	-2.89388	0.00797616
TRINITY_DN10213_c0_g1_i1	CAE7444470.1 noxA [Symbiodinium sp. KB8]	-2.88803	0.00913971
TRINITY_DN14101_c0_g1_i1	XP_024375384.1 probable NADH dehydrogenase [ubiquinone] 1 alpha subcomplex subunit 5, mitochondrial [Physcomitrium patens]	-2.88367	0.0220342
TRINITY_DN31074_c0_g1_i1	CAE7877569.1 unnamed protein product [Symbiodinium sp. KB8]	-2.88257	0.0307899
TRINITY_DN2699_c0_g1_i1	CAE7877204.1 RGGB, partial [Symbiodinium sp. KB8]	-2.88046	0.00188309
TRINITY_DN8962_c0_g1_i1	KAA0151605.1 hypothetical protein FNF29_04529 [Cafeteria roenbergensis]	-2.87393	0.0174328
TRINITY_DN16290_c0_g1_i1	CAE7248823.1 Rac1 [Symbiodinium sp. KB8]	-2.87068	0.0280574
TRINITY_DN5871_c0_g2_i1	CAE7029763.1 DRG1, partial [Symbiodinium sp. KB8]	-2.86939	0.0380201
TRINITY_DN1503_c0_g3_i1	CAE7643335.1 bimG [Symbiodinium sp. KB8]	-2.86802	0.00173249
TRINITY_DN66039_c0_g1_i1	CAE7632228.1 rps2402, partial [Symbiodinium sp. KB8]	-2.86339	8.80562e-07
TRINITY_DN18296_c0_g1_i1	CAE7837624.1 NSDHL, partial [Symbiodinium sp. KB8]	-2.85786	0.0331873
TRINITY_DN11205_c0_g1_i1	KAF4143295.1 WD domain G-beta repeat domain-containing protein [Phytophthora infestans]	-2.85612	0.0125121
TRINITY_DN15651_c0_g1_i1	CAE7339926.1 etfdh [Symbiodinium sp. KB8]	-2.8506	0.0108646
TRINITY_DN19698_c0_g1_i1	CAE7341224.1 OST48 [Symbiodinium sp. KB8]	-2.84928	0.0216148
TRINITY_DN2393_c0_g1_i1	CAE7275805.1 PBB2 [Symbiodinium sp. KB8]	-2.84829	0.0142099
TRINITY_DN19912_c0_g1_i1	CAE7816647.1 GAL1, partial [Symbiodinium sp. KB8]	-2.84198	0.0467769
TRINITY_DN18216_c0_g1_i1	CAE7894490.1 bckd-1A [Symbiodinium sp. KB8]	-2.84127	0.00864855
TRINITY_DN58366_c0_g1_i1	CAE7850629.1 RPL26A [Symbiodinium sp. KB8]	-2.83893	0.000344243
TRINITY_DN9746_c0_g1_i1	CAE7221296.1 unnamed protein product [Symbiodinium sp. KB8]	-2.83449	0.00851736
TRINITY_DN1743_c0_g2_i1	KAA0146414.1 hypothetical protein FNF29_08064 [Cafeteria roenbergensis]	-2.83118	0.026965
TRINITY_DN2502_c0_g1_i1	CAE7682499.1 cct4 [Symbiodinium sp. KB8]	-2.82439	0.00364213
TRINITY_DN19817_c0_g2_i1	CAE7844721.1 unnamed protein product, partial [Symbiodinium sp. KB8]	-2.82173	0.028618
TRINITY_DN24587_c0_g1_i1	CAE7802563.1 unnamed protein product [Symbiodinium sp. KB8]	-2.81681	0.00211452
TRINITY_DN4264_c0_g1_i1	RYG42201.1 hypothetical protein EON68_02135, partial [archaeon]	-2.81107	0.00655972
TRINITY_DN18343_c0_g1_i1	KAF0734216.1 hypothetical protein Ae201684_009079 [Aphanomyces euteiches]	-2.80825	0.0300773
TRINITY_DN12337_c0_g1_i1	CAE7724921.1 CML13 [Symbiodinium sp. KB8]	-2.80718	0.0192163
TRINITY_DN856_c0_g1_i1	KAA0154095.1 hypothetical protein FNF29_02718 [Cafeteria roenbergensis]	-2.79815	0.000318611
TRINITY_DN5675_c0_g1_i2	CAE7494917.1 PDH2 [Symbiodinium sp. KB8]	-2.79302	0.00549116
TRINITY_DN7360_c0_g1_i1	KAA0156059.1 hypothetical protein FNF29_01475 [Cafeteria roenbergensis]	-2.7901	0.0158967
TRINITY_DN3854_c0_g1_i6	XP_026813666.1 histone H3-like [Rhopalosiphum maidis]	-2.78627	0.000454818
TRINITY_DN7521_c0_g1_i1	CAE7561564.1 HERC1, partial [Symbiodinium sp. KB8]	-2.77977	0.00975394
TRINITY_DN1804_c0_g1_i1	CAE7889952.1 SCSa, partial [Symbiodinium sp. KB8]	-2.77651	0.0108082
TRINITY_DN3630_c0_g1_i1	CAE7790650.1 PRXIIC [Symbiodinium sp. KB8]	-2.76052	0.00834509
TRINITY_DN48142_c0_g1_i1	CAE7342387.1 unnamed protein product [Symbiodinium sp. KB8]	-2.75762	0.00955491
TRINITY_DN22629_c0_g1_i1	CAE7374837.1 MRF1 [Symbiodinium sp. KB8]	-2.7524	0.00497278
TRINITY_DN5151_c0_g2_i1	CAE7720231.1 MTR, partial [Symbiodinium sp. KB8]	-2.75026	0.0262375
TRINITY_DN39653_c0_g1_i1	CAE7212118.1 unnamed protein product [Symbiodinium sp. KB8]	-2.74903	0.00417589
TRINITY_DN1078_c1_g1_i1	CAE7212138.1 rpl23, partial [Symbiodinium sp. KB8]	-2.74651	0.000350418
TRINITY_DN32942_c0_g1_i1	CAE7305529.1 RPN2A [Symbiodinium sp. KB8]	-2.74286	0.0172741
TRINITY_DN10008_c0_g1_i1	CAE7873435.1 unnamed protein product [Symbiodinium sp. KB8]	-2.74244	0.00852656
TRINITY_DN32828_c0_g1_i1	CAE7866266.1 icd-1 [Symbiodinium sp. KB8]	-2.73772	0.0170847
TRINITY_DN8833_c0_g1_i2	CAE7669456.1 AOAH [Symbiodinium sp. KB8]	-2.73548	0.0279399
TRINITY_DN55420_c0_g1_i1	TFJ81363.1 hypothetical protein NSK_007324 [Nannochloropsis salina CCMP1776]	-2.73537	0.0469992
TRINITY_DN11823_c0_g2_i1	KAA0145772.1 hypothetical protein FNF28_07802 [Cafeteria roenbergensis]	-2.7298	0.0360283
TRINITY_DN7093_c0_g1_i1	CAE7640920.1 unnamed protein product, partial [Symbiodinium sp. KB8]	-2.7276	0.000185503
TRINITY_DN30423_c0_g1_i1	KAA0164209.1 hypothetical protein FNF31_02445 [Cafeteria roenbergensis]	-2.72672	0.0262375
TRINITY_DN40090_c0_g1_i1	CAE7759407.1 SR34, partial [Symbiodinium sp. KB8]	-2.72291	0.0132338
TRINITY_DN3254_c3_g1_i1	PYO96586.1 DUF4442 domain-containing protein [Gemmatimonadetes bacterium]	-2.71891	0.0219243
TRINITY_DN4746_c0_g1_i1	KAA0162911.1 hypothetical protein FNF28_04467 [Cafeteria roenbergensis]	-2.71476	0.0453771
TRINITY_DN2022_c0_g1_i1	KAA0150670.1 hypothetical protein FNF31_06989 [Cafeteria roenbergensis]	-2.71119	0.00117483
TRINITY_DN16942_c0_g1_i1	CAE7864989.1 unnamed protein product, partial [Symbiodinium sp. KB8]	-2.70917	0.0452275
TRINITY_DN56794_c0_g1_i1	CAH0374912.1 unnamed protein product [Pelagomonas calceolata]	-2.70532	0.0129501
TRINITY_DN66069_c1_g1_i1	KAA0156009.1 hypothetical protein FNF29_01427 [Cafeteria roenbergensis]	-2.70492	0.00019861
TRINITY_DN6159_c0_g1_i5	KAA0149609.1 hypothetical protein FNF29_05821 [Cafeteria roenbergensis]	-2.70113	0.00267855
TRINITY_DN913_c1_g1_i1	KAA0155330.1 hypothetical protein FNF29_01705 [Cafeteria roenbergensis]	-2.69563	0.000599455
TRINITY_DN55721_c0_g1_i1	ORX83796.1 hypothetical protein BCR32DRAFT_230981 [Anaeromyces robustus]	-2.69527	0.000322779
TRINITY_DN585_c6_g1_i1	KAA0153286.1 hypothetical protein FNF29_03100 [Cafeteria roenbergensis]	-2.69357	0.00964638
TRINITY_DN11609_c0_g1_i1	CAE7557685.1 unnamed protein product [Symbiodinium sp. KB8]	-2.69058	0.0477576
TRINITY_DN12268_c0_g1_i1	CAE7036855.1 unnamed protein product [Symbiodinium sp. KB8]	-2.68963	0.00925071
TRINITY_DN40151_c0_g1_i1	CAE7466382.1 RPT2, partial [Symbiodinium sp. KB8]	-2.68881	0.0358155
TRINITY_DN6341_c0_g1_i1	CAE7731616.1 IFT25 [Symbiodinium sp. KB8]	-2.68545	0.0300773
TRINITY_DN32104_c0_g1_i1	KAA0160722.1 hypothetical protein FNF28_05358 [Cafeteria roenbergensis]	-2.6825	0.0343805
TRINITY_DN1025_c0_g1_i1	CAE7351444.1 unnamed protein product [Symbiodinium sp. KB8]	-2.67831	1.44747e-05
TRINITY_DN103_c0_g2_i1	KAA0147099.1 hypothetical protein FNF29_07589 [Cafeteria roenbergensis]	-2.6637	5.24061e-05
TRINITY_DN65676_c0_g1_i1	CAE7244666.1 Ppp2r1a [Symbiodinium sp. KB8]	-2.66351	0.020022
TRINITY_DN15615_c0_g1_i1	CAE7246583.1 gnb1 [Symbiodinium sp. KB8]	-2.66158	0.00158217
TRINITY_DN1354_c0_g1_i1	CAE7532617.1 ndk-1 [Symbiodinium sp. KB8]	-2.65191	0.0205976
TRINITY_DN11244_c0_g1_i1	CAE7483184.1 uap1l1 [Symbiodinium sp. KB8]	-2.64927	0.0208164
TRINITY_DN9686_c0_g1_i1	CAE7949908.1 PSMB6 [Symbiodinium sp. KB8]	-2.64481	0.0180257
TRINITY_DN3417_c0_g1_i2	CAE7920759.1 MPK3 [Symbiodinium sp. KB8]	-2.6282	0.0289661
TRINITY_DN3748_c0_g1_i1	CAE7273926.1 unnamed protein product [Symbiodinium sp. KB8]	-2.62206	0.0486548
TRINITY_DN8711_c0_g1_i1	CAE7828304.1 SSR2 [Symbiodinium sp. KB8]	-2.59953	0.00455321
TRINITY_DN7998_c0_g1_i1	CAE7530774.1 unnamed protein product [Symbiodinium sp. KB8]	-2.5938	0.0277165
TRINITY_DN55472_c0_g1_i1	CAE7468268.1 ARPC3 [Symbiodinium sp. KB8]	-2.59246	0.0198801
TRINITY_DN3872_c0_g1_i1	CAE7731898.1 CFAP52, partial [Symbiodinium sp. KB8]	-2.58598	0.00264337
TRINITY_DN10825_c0_g1_i1	CAE7258258.1 unnamed protein product [Symbiodinium sp. KB8]	-2.57649	0.0281155
TRINITY_DN9182_c0_g1_i1	KAA0148382.1 hypothetical protein FNF29_06769 [Cafeteria roenbergensis]	-2.56726	0.0156316
TRINITY_DN39_c6_g1_i1	USP77035.1 60S acidic ribosomal protein P2 [Curvularia clavata]	-2.56704	0.001169
TRINITY_DN529_c1_g1_i1	QWE91268.1 methionine adenosyltransferase [Placidida sp.]	-2.56429	0.000276458
TRINITY_DN3274_c0_g1_i1	KAA0152577.1 hypothetical protein FNF29_03804 [Cafeteria roenbergensis]	-2.5605	0.000914666
TRINITY_DN40396_c0_g1_i1	CAE6960322.1 unnamed protein product [Symbiodinium sp. KB8]	-2.55365	0.0215276
TRINITY_DN38989_c0_g1_i1	CAE7834159.1 RPS17C, partial [Symbiodinium sp. KB8]	-2.55056	0.00121549
TRINITY_DN20614_c0_g1_i1	CAE7303559.1 CDC48, partial [Symbiodinium sp. KB8]	-2.54973	0.0230165
TRINITY_DN1621_c0_g1_i1	CAE7034621.1 Hacd2 [Symbiodinium sp. KB8]	-2.54438	0.0380187
TRINITY_DN819_c0_g2_i1	CAE7882387.1 eIF-5A [Symbiodinium sp. KB8]	-2.53942	0.00112922
TRINITY_DN14458_c0_g1_i1	CAE7318250.1 eif3b [Symbiodinium sp. KB8]	-2.5369	0.0184274
TRINITY_DN7632_c0_g1_i1	CAE7496234.1 dbt-1 [Symbiodinium sp. KB8]	-2.53662	0.0380201
TRINITY_DN56554_c0_g1_i1	GFH59754.1 hypothetical protein CTEN210_16230 [Chaetoceros tenuissimus]	-2.53494	0.0085706
TRINITY_DN3287_c0_g1_i1	CAE7374781.1 RPP0A [Symbiodinium sp. KB8]	-2.53298	0.00169812
TRINITY_DN19291_c0_g1_i1	CAE7248547.1 STE1 [Symbiodinium sp. KB8]	-2.53063	0.0414016
TRINITY_DN63890_c0_g1_i1	RYY32887.1 hypothetical protein EON62_04840 [archaeon]	-2.52829	0.0387695
TRINITY_DN2013_c0_g1_i1	CAE7851428.1 DNAJB4 [Symbiodinium sp. KB8]	-2.52814	0.039559
TRINITY_DN1464_c0_g1_i1	CAE7223199.1 rps2 [Symbiodinium sp. KB8]	-2.52785	0.00147526
TRINITY_DN66714_c0_g1_i1	CAE7612171.1 SMT1, partial [Symbiodinium sp. KB8]	-2.52732	0.0214283
TRINITY_DN1239_c0_g1_i3	CAE7760072.1 unnamed protein product, partial [Symbiodinium sp. KB8]	-2.51979	0.00214423
TRINITY_DN5773_c0_g1_i1	CAE7041741.1 NDUFA12 [Symbiodinium sp. KB8]	-2.51819	0.0104419
TRINITY_DN11187_c0_g1_i1	KAA0156825.1 hypothetical protein FNF29_00935 [Cafeteria roenbergensis]	-2.51469	0.0353832
TRINITY_DN13454_c0_g1_i1	KAA0146603.1 hypothetical protein FNF29_07936 [Cafeteria roenbergensis]	-2.51451	0.0170468
TRINITY_DN977_c0_g1_i2	CAE7276073.1 RPT6B, partial [Symbiodinium sp. KB8]	-2.51424	0.019268
TRINITY_DN10781_c0_g1_i2	KAA0156672.1 hypothetical protein FNF29_00783 [Cafeteria roenbergensis]	-2.51244	0.030948
TRINITY_DN10748_c0_g1_i1	KAA0160738.1 hypothetical protein FNF31_04122 [Cafeteria roenbergensis]	-2.50954	0.0403634
TRINITY_DN59056_c0_g1_i1	CAE7398985.1 unnamed protein product [Symbiodinium sp. KB8]	-2.50926	0.0357424
TRINITY_DN22162_c0_g1_i1	CAE7725585.1 eif3a [Symbiodinium sp. KB8]	-2.50605	0.00532857
TRINITY_DN14880_c0_g1_i1	CAE7919205.1 Rsph1 [Symbiodinium sp. KB8]	-2.49757	0.0360969
TRINITY_DN1610_c0_g2_i1	CAE7545306.1 rpl401 [Symbiodinium sp. KB8]	-2.49491	0.00549076
TRINITY_DN14237_c0_g1_i1	CAE7926605.1 Pde11 [Symbiodinium sp. KB8]	-2.49311	0.0265462
TRINITY_DN58828_c0_g1_i1	CAE7241447.1 unnamed protein product [Symbiodinium sp. KB8]	-2.49052	0.0474453
TRINITY_DN17311_c0_g1_i1	CAE7870598.1 unnamed protein product, partial [Symbiodinium sp. KB8]	-2.48196	0.0464917
TRINITY_DN50103_c0_g1_i1	CAE7875840.1 usf [Symbiodinium sp. KB8]	-2.48058	0.0263632
TRINITY_DN1982_c0_g1_i1	CAE7262187.1 pdi-2 [Symbiodinium sp. KB8]	-2.47832	0.00402142
TRINITY_DN12523_c0_g1_i1	CAE7306433.1 Psmd12 [Symbiodinium sp. KB8]	-2.47613	0.0117716
TRINITY_DN20600_c0_g1_i1	CAE7517501.1 E [Symbiodinium sp. KB8] [Symbiodinium sp. KB8]	-2.47367	0.0348381
TRINITY_DN9746_c0_g2_i1	XP_009032194.1 hypothetical protein AURANDRAFT_18647 [Aureococcus anophagefferens]	-2.47106	0.0119135
TRINITY_DN4482_c0_g1_i1	CAE7940363.1 ctsD, partial [Symbiodinium sp. KB8]	-2.46727	0.000952217
TRINITY_DN2640_c0_g2_i1	KAA0173713.1 hypothetical protein FNF27_04863 [Cafeteria roenbergensis]	-2.46608	0.0357512
TRINITY_DN20717_c0_g1_i1	CAE7628213.1 GFUS, partial [Symbiodinium sp. KB8]	-2.46558	0.0439433
TRINITY_DN4421_c0_g1_i1	CAE7857634.1 unnamed protein product, partial [Symbiodinium sp. KB8]	-2.46242	0.00805245
TRINITY_DN3277_c0_g1_i1	KAA0154984.1 hypothetical protein FNF29_02128 [Cafeteria roenbergensis]	-2.46059	0.0223666
TRINITY_DN8800_c0_g1_i1	CAE7854574.1 unnamed protein product [Symbiodinium sp. KB8]	-2.45919	0.0340603
TRINITY_DN48592_c0_g1_i1	KAA0157470.1 hypothetical protein FNF29_00046 [Cafeteria roenbergensis]	-2.45874	0.0020392
TRINITY_DN1671_c0_g1_i1	CAE7436660.1 rps15a [Symbiodinium sp. KB8]	-2.45839	0.0135405
TRINITY_DN757_c0_g1_i2	CAE7303576.1 Ddx39a [Symbiodinium sp. KB8]	-2.45692	0.00272387
TRINITY_DN2884_c1_g1_i1	KAA0155260.1 hypothetical protein FNF29_02011 [Cafeteria roenbergensis]	-2.45674	0.039559
TRINITY_DN1500_c0_g1_i2	PNH07277.1 Flavoprotein-like protein YCP4 [Tetrabaena socialis]	-2.45643	0.0155134
TRINITY_DN40896_c0_g1_i1	CAE7832238.1 RPS7, partial [Symbiodinium sp. KB8]	-2.45382	0.00364773
TRINITY_DN47941_c0_g1_i1	CAE7935592.1 NHP2 [Symbiodinium sp. KB8]	-2.44974	0.0116423
TRINITY_DN34_c0_g2_i1	CAE7242924.1 RPL27AC, partial [Symbiodinium sp. KB8]	-2.44896	0.00655972
TRINITY_DN30437_c0_g1_i1	CAE7875533.1 BBS4 [Symbiodinium sp. KB8]	-2.44285	0.0213586
TRINITY_DN10202_c0_g1_i1	CAE7341000.1 Efhc1 [Symbiodinium sp. KB8]	-2.43243	0.00609693
TRINITY_DN47103_c0_g1_i1	KAA0160690.1 hypothetical protein FNF27_08228 [Cafeteria roenbergensis]	-2.42641	0.0218717
TRINITY_DN9089_c0_g1_i1	KAA0150864.1 hypothetical protein FNF29_04978 [Cafeteria roenbergensis]	-2.42422	0.0240135
TRINITY_DN19922_c0_g1_i1	KAA0155350.1 hypothetical protein FNF29_01725 [Cafeteria roenbergensis]	-2.42282	0.0420104
TRINITY_DN4229_c0_g3_i1	XP_020990123.1 uncharacterized protein LOC110277297 [Arachis duranensis]	-2.41795	0.0032376
TRINITY_DN17578_c0_g1_i1	CAE7946134.1 unnamed protein product [Symbiodinium sp. KB8]	-2.41743	0.0262936
TRINITY_DN7559_c0_g1_i1	KAA0149501.1 hypothetical protein FNF29_05887 [Cafeteria roenbergensis]	-2.41731	0.0186598
TRINITY_DN216_c1_g1_i1	EWM30340.1 60s ribosomal protein l37a [Nannochloropsis gaditana]	-2.41318	0.0145227
TRINITY_DN31200_c0_g1_i1	CAE7213514.1 CSN1 [Symbiodinium sp. KB8]	-2.41172	0.0467877
TRINITY_DN19792_c0_g1_i1	KIL59894.1 hypothetical protein M378DRAFT_26795 [Amanita muscaria Koide BX008]	-2.40875	0.0239286
TRINITY_DN29759_c0_g1_i1	CAE7265730.1 CDC48 [Symbiodinium sp. KB8]	-2.4086	0.0198801
TRINITY_DN17192_c0_g1_i1	CAE7282409.1 aarA [Symbiodinium sp. KB8]	-2.40254	0.0232522
TRINITY_DN31271_c0_g1_i1	CAE7246939.1 unnamed protein product [Symbiodinium sp. KB8]	-2.4007	0.0110824
TRINITY_DN64350_c0_g1_i1	CAE7818540.1 Uchl3 [Symbiodinium sp. KB8]	-2.40039	0.00880411
TRINITY_DN15800_c0_g1_i1	CAE7400576.1 MTHFR2 [Symbiodinium sp. KB8]	-2.39655	0.00384054
TRINITY_DN63860_c0_g1_i1	CAE7305126.1 corA, partial [Symbiodinium sp. KB8]	-2.39597	0.00449392
TRINITY_DN5281_c0_g2_i1	PRP74129.1 LIM-type zinc finger-containing protein [Planoprotostelium fungivorum]	-2.39395	0.0228029
TRINITY_DN38919_c0_g1_i1	CAE7353121.1 EB1C [Symbiodinium sp. KB8]	-2.39242	0.00155673
TRINITY_DN7022_c0_g1_i1	CAE7272508.1 unnamed protein product [Symbiodinium sp. KB8]	-2.38879	0.00361268
TRINITY_DN4222_c0_g2_i1	MCA9059272.1 FG-GAP repeat protein [Planctomycetaceae bacterium]	-2.37799	0.0401325
TRINITY_DN7805_c0_g1_i1	CAE7414438.1 DNAH9, partial [Symbiodinium sp. KB8]	-2.37545	0.0180913
TRINITY_DN15017_c0_g1_i1	KAG5183240.1 dihydrolipoamide dehydrogenase [Tribonema minus]	-2.37443	0.00421295
TRINITY_DN7815_c0_g1_i1	CAE7223952.1 Nudt22 [Symbiodinium sp. KB8]	-2.37214	0.0401947
TRINITY_DN44508_c0_g1_i1	CAE7857274.1 VBP1 [Symbiodinium sp. KB8]	-2.37183	0.0426485
TRINITY_DN9208_c0_g1_i1	XP_004338796.1 LBP / BPI / CETP family, Cterminal domain containing protein [Acanthamoeba castellanii str. Neff]	-2.37139	0.0138251
TRINITY_DN12966_c0_g1_i1	CAE7221928.1 TMN7 [Symbiodinium sp. KB8]	-2.3645	0.0453948
TRINITY_DN5316_c0_g2_i1	CAE7677895.1 ALDH3H1 [Symbiodinium sp. KB8]	-2.35965	0.0313419
TRINITY_DN57858_c0_g1_i1	CAE7446230.1 ran [Symbiodinium sp. KB8]	-2.35767	0.0212492
TRINITY_DN7571_c0_g1_i1	CAE7724135.1 PBG1 [Symbiodinium sp. KB8]	-2.35718	0.0281974
TRINITY_DN386_c1_g2_i1	CAE7378950.1 cpc-2, partial [Symbiodinium sp. KB8]	-2.34619	0.00254051
TRINITY_DN31_c0_g2_i1	CAE7856432.1 RPL3, partial [Symbiodinium sp. KB8]	-2.34601	0.000660891
TRINITY_DN39603_c0_g1_i1	KAA0152838.1 hypothetical protein FNF29_03725 [Cafeteria roenbergensis]	-2.3426	0.0160488
TRINITY_DN1815_c0_g1_i1	CAE7901366.1 RPL32 [Symbiodinium sp. KB8]	-2.34206	0.000726473
TRINITY_DN40673_c0_g1_i1	CAE7305546.1 unnamed protein product, partial [Symbiodinium sp. KB8]	-2.342	0.00913971
TRINITY_DN24663_c0_g1_i1	CAE7583336.1 PAE1, partial [Symbiodinium sp. KB8]	-2.33821	0.0329026
TRINITY_DN9217_c0_g1_i1	CAE7906436.1 unnamed protein product, partial [Symbiodinium sp. KB8]	-2.3369	0.0426485
TRINITY_DN19583_c0_g1_i1	CAE7876506.1 unnamed protein product, partial [Symbiodinium sp. KB8]	-2.33216	0.0278407
TRINITY_DN47308_c0_g1_i1	CAE7917882.1 rpl28, partial [Symbiodinium sp. KB8]	-2.33027	0.0325346
TRINITY_DN67751_c0_g1_i1	CAE7892592.1 ALIS1 [Symbiodinium sp. KB8]	-2.32374	0.0109953
TRINITY_DN31960_c0_g1_i1	KOO30631.1 u6 snRNA-associated sm-like protein lsm3 [Chrysochromulina tobinii]	-2.31481	0.0467769
TRINITY_DN12957_c0_g1_i1	CAE7313042.1 unnamed protein product [Symbiodinium sp. KB8]	-2.31308	0.0259935
TRINITY_DN2547_c0_g1_i1	TFJ88647.1 hypothetical protein NSK_000216 [Nannochloropsis salina CCMP1776]	-2.30718	0.037566
TRINITY_DN17360_c1_g1_i1	AYV89237.1 10 kDa heat shock mitochondrial-like [Tetranychus evansi]	-2.30519	0.038728
TRINITY_DN11308_c0_g1_i1	CAE7281650.1 Ndufa9 [Symbiodinium sp. KB8]	-2.30277	0.00865253
TRINITY_DN3924_c0_g2_i1	KAA0177570.1 hypothetical protein FNF27_00740 [Cafeteria roenbergensis]	-2.30039	0.0040423
TRINITY_DN21108_c0_g1_i1	CAE7467192.1 unnamed protein product [Symbiodinium sp. KB8]	-2.29919	0.0357512
TRINITY_DN63956_c0_g1_i1	CAE7767111.1 unnamed protein product, partial [Symbiodinium sp. KB8]	-2.29879	0.00366697
TRINITY_DN29623_c0_g1_i1	CAE7788061.1 RPL5, partial [Symbiodinium sp. KB8]	-2.29332	0.00517727
TRINITY_DN3645_c0_g1_i1	CAE7846124.1 GSN, partial [Symbiodinium sp. KB8]	-2.29263	0.0120229
TRINITY_DN1630_c0_g1_i1	TMW60107.1 hypothetical protein Poli38472_000149 [Pythium oligandrum]	-2.29221	0.00169812
TRINITY_DN40263_c0_g1_i1	CAE7545243.1 SGPP1, partial [Symbiodinium sp. KB8]	-2.29067	0.0283042
TRINITY_DN13941_c0_g1_i1	XP_013016965.1 adenine phosphoribosyltransferase [Schizosaccharomyces octosporus yFS286]	-2.28543	0.0296801
TRINITY_DN6517_c0_g1_i1	CAE7538539.1 tenm4, partial [Symbiodinium sp. KB8]	-2.28532	0.0429778
TRINITY_DN6707_c0_g1_i1	CAE7619215.1 hsd17b12 [Symbiodinium sp. KB8]	-2.284	0.0380201
TRINITY_DN18355_c0_g1_i1	CAE7592415.1 aprA [Symbiodinium sp. KB8]	-2.28277	0.00609693
TRINITY_DN41036_c0_g1_i1	KAG5184434.1 26S protease regulatory subunit 6A-A [Tribonema minus]	-2.27861	0.0270973
TRINITY_DN11403_c0_g1_i1	CAE7245547.1 ATJ2 [Symbiodinium sp. KB8]	-2.27616	0.0109956
TRINITY_DN428_c0_g1_i1	CAE7715682.1 RPL8 [Symbiodinium sp. KB8]	-2.27226	0.00214423
TRINITY_DN18372_c0_g1_i1	KAG5178368.1 cytochrome c [Tribonema minus]	-2.27155	0.0333247
TRINITY_DN32461_c0_g1_i1	CAE7671171.1 UBE2V2, partial [Symbiodinium sp. KB8]	-2.27124	0.0427189
TRINITY_DN209_c6_g1_i1	CAE7789422.1 Iqca1, partial [Symbiodinium sp. KB8]	-2.27019	0.0420104
TRINITY_DN3169_c1_g1_i1	CAE7263341.1 CYP19-3 [Symbiodinium sp. KB8]	-2.26737	0.0331873
TRINITY_DN3445_c0_g1_i1	CAE7684946.1 Ssna1 [Symbiodinium sp. KB8]	-2.26684	0.0201461
TRINITY_DN14883_c0_g1_i2	KAA0168528.1 hypothetical protein FNF31_00408 [Cafeteria roenbergensis]	-2.26627	0.00288099
TRINITY_DN47409_c0_g1_i1	KAF1329826.1 Elongator complex protein 3, partial [Globisporangium splendens]	-2.26579	0.048645
TRINITY_DN39217_c0_g1_i1	CAE7436630.1 ADK, partial [Symbiodinium sp. KB8]	-2.26102	0.019268
TRINITY_DN14611_c0_g1_i1	CAE7941829.1 Rhbg, partial [Symbiodinium sp. KB8]	-2.25841	0.0379107
TRINITY_DN68736_c0_g1_i1	CAE7196138.1 rpl35 [Symbiodinium sp. KB8]	-2.25639	0.0138251
TRINITY_DN3613_c1_g1_i1	TNV75937.1 hypothetical protein FGO68_gene16016 [Halteria grandinella]	-2.25376	0.039559
TRINITY_DN11_c0_g3_i1	RLN82594.1 hypothetical protein BBJ28_00003769 [Nothophytophthora sp. Chile5]	-2.25159	0.00460137
TRINITY_DN16338_c0_g1_i1	CAE7039094.1 NPEPL1 [Symbiodinium sp. KB8]	-2.24834	0.0213586
TRINITY_DN1333_c0_g1_i1	CAE7775932.1 RPL31, partial [Symbiodinium sp. KB8]	-2.24829	0.000869875
TRINITY_DN29932_c0_g1_i1	CAE7708097.1 RPL35AA [Symbiodinium sp. KB8]	-2.24546	0.0115039
TRINITY_DN2028_c0_g1_i1	KAA0148468.1 hypothetical protein FNF29_06685 [Cafeteria roenbergensis]	-2.23594	0.00452873
TRINITY_DN1191_c0_g3_i1	KAA0156680.1 hypothetical protein FNF29_00791 [Cafeteria roenbergensis]	-2.23553	0.0128235
TRINITY_DN2858_c0_g1_i1	KAA0152802.1 hypothetical protein FNF29_03689 [Cafeteria roenbergensis]	-2.23544	0.00472822
TRINITY_DN4734_c0_g1_i1	CAE7912374.1 AP4M, partial [Symbiodinium sp. KB8]	-2.232	0.0357512
TRINITY_DN22174_c0_g1_i1	XP_022839973.1 Ribosomal protein L38e [Ostreococcus tauri]	-2.21891	0.00211452
TRINITY_DN527_c1_g3_i2	KAG5187253.1 ribosomal protein S2, flavodoxin-like domain-containing protein [Tribonema minus]	-2.21825	0.00165035
TRINITY_DN4337_c1_g1_i1	CAE7535222.1 SYT4, partial [Symbiodinium sp. KB8]	-2.21094	0.0354868
TRINITY_DN9644_c0_g1_i1	XP_003064071.1 predicted protein [Micromonas pusilla CCMP1545]	-2.21046	0.0379107
TRINITY_DN1239_c0_g2_i1	CAE7760072.1 unnamed protein product, partial [Symbiodinium sp. KB8]	-2.20879	0.00802042
TRINITY_DN56464_c0_g1_i1	CAE7387024.1 rps1902 [Symbiodinium sp. KB8]	-2.2003	0.00105097
TRINITY_DN933_c0_g3_i1	RYY35028.1 30S ribosomal protein S17 [archaeon]	-2.19823	0.0040423
TRINITY_DN423_c0_g1_i1	CAE7884787.1 unnamed protein product [Symbiodinium sp. KB8]	-2.19704	0.000230974
TRINITY_DN5659_c0_g1_i1	OQO04369.1 Endoplasmic reticulum vesicle protein 25 [Rachicladosporium antarcticum]	-2.19619	0.0212492
TRINITY_DN912_c0_g2_i1	CAE7797903.1 RPL19B, partial [Symbiodinium sp. KB8]	-2.19578	0.00703311
TRINITY_DN21127_c0_g1_i1	CAE7216913.1 CYCL [Symbiodinium sp. KB8]	-2.19439	0.00914804
TRINITY_DN19800_c0_g1_i1	CAE7732379.1 CCDC39, partial [Symbiodinium sp. KB8]	-2.18956	0.0489025
TRINITY_DN66370_c0_g1_i1	CAE7852444.1 RPS15 [Symbiodinium sp. KB8]	-2.18921	0.00627702
TRINITY_DN3109_c3_g1_i1	KAG1705663.1 60S ribosomal protein L10a-1 [Phytophthora capsici]	-2.18599	0.00195949
TRINITY_DN30363_c0_g1_i1	CAE7319094.1 RPS3A [Symbiodinium sp. KB8]	-2.1784	0.01801
TRINITY_DN9603_c0_g1_i1	CAE7877991.1 unnamed protein product, partial [Symbiodinium sp. KB8]	-2.16856	0.0272954
TRINITY_DN359_c0_g1_i1	CAE6970858.1 rps16 [Symbiodinium sp. KB8]	-2.16367	0.00402142
TRINITY_DN3643_c1_g1_i10	KAG9649316.1 ATP-dependent RNA helicase fal1, partial [Aureobasidium melanogenum]	-2.16353	0.0209745
TRINITY_DN5381_c0_g1_i1	CAE7467057.1 PAB4, partial [Symbiodinium sp. KB8]	-2.15717	0.0337341
TRINITY_DN3173_c0_g1_i1	KAG0590382.1 hypothetical protein KC19_1G095100 [Ceratodon purpureus]	-2.15631	0.0225369
TRINITY_DN1720_c0_g1_i1	CAE7873084.1 Apod, partial [Symbiodinium sp. KB8]	-2.1493	0.0111238
TRINITY_DN55543_c0_g1_i1	CAE7592420.1 rps12 [Symbiodinium sp. KB8]	-2.14776	0.0295113
TRINITY_DN55930_c0_g1_i1	KAG8579509.1 hypothetical protein GDO81_010919 [Engystomops pustulosus]	-2.14678	0.0119258
TRINITY_DN867_c0_g1_i1	CAE7243864.1 rpl-7 [Symbiodinium sp. KB8]	-2.14352	0.0040423
TRINITY_DN57086_c0_g1_i1	XP_002899857.1 conserved hypothetical protein [Phytophthora infestans T30-4]	-2.13845	0.0150619
TRINITY_DN65072_c0_g1_i1	GAY03080.1 60S ribosomal protein L17-2 [Pythium insidiosum]	-2.13761	0.00722689
TRINITY_DN40154_c0_g1_i1	XP_026314674.1 LOW QUALITY PROTEIN: 40S ribosomal protein S25, partial [Hyposmocoma kahamanoa]	-2.13562	0.00607734
TRINITY_DN1861_c0_g1_i1	CAE7505474.1 cpz-1 [Symbiodinium sp. KB8]	-2.133	0.0125376
TRINITY_DN2478_c0_g1_i2	CAE7333662.1 SCPL20 [Symbiodinium sp. KB8]	-2.13115	0.0378783
TRINITY_DN15836_c0_g1_i1	CAE7758734.1 Efhc1 [Symbiodinium sp. KB8]	-2.13033	0.0298737
TRINITY_DN47226_c0_g1_i1	CAE7300711.1 RPL15 [Symbiodinium microadriaticum]	-2.12495	0.00282563
TRINITY_DN46915_c0_g1_i1	GFP87053.1 serine/threonine-protein kinase pepkr2 [Phtheirospermum japonicum]	-2.12194	0.0207466
TRINITY_DN39054_c0_g1_i1	CAE7930977.1 RpL37a, partial [Symbiodinium sp. KB8]	-2.12187	0.0111749
TRINITY_DN1441_c0_g1_i1	CAE7914973.1 RPL44, partial [Symbiodinium sp. KB8]	-2.11088	0.0040423
TRINITY_DN30489_c0_g1_i1	AAP80839.1 ribosomal S29-like protein [Griffithsia japonica]	-2.10562	0.0161611
TRINITY_DN57543_c0_g1_i1	XP_020627968.1 ubiquitin domain-containing protein UBFD1-like [Orbicella faveolata]	-2.0962	0.0224195
TRINITY_DN17825_c0_g1_i2	CAE7208464.1 unnamed protein product [Symbiodinium sp. KB8]	-2.09292	0.0199007
TRINITY_DN18_c0_g1_i10	ABX55852.1 actin, partial [Spumella-like flagellate JBC/S24]	-2.09129	0.0198376
TRINITY_DN40779_c0_g1_i1	KAA0168110.1 hypothetical protein FNF31_00609 [Cafeteria roenbergensis]	-2.08945	0.0216148
TRINITY_DN39334_c0_g1_i1	CAE7603688.1 RpS10b [Symbiodinium sp. KB8]	-2.08333	0.0292562
TRINITY_DN58883_c0_g1_i1	CAE6922685.1 RPL23A [Symbiodinium sp. KB8]	-2.08112	0.00588527
TRINITY_DN10309_c0_g1_i1	PRP81869.1 hypothetical protein PROFUN_08733 [Planoprotostelium fungivorum]	-2.07712	0.038728
TRINITY_DN17754_c0_g1_i1	CAE7646553.1 Ing1 [Symbiodinium sp. KB8]	-2.07629	0.0483743
TRINITY_DN8389_c0_g1_i1	PXF49075.1 Myb-like protein J [Gracilariopsis chorda]	-2.07275	0.048419
TRINITY_DN5563_c0_g1_i1	CAE7445445.1 unnamed protein product, partial [Symbiodinium sp. KB8]	-2.0699	0.0453948
TRINITY_DN2592_c0_g1_i2	TPX57673.1 hypothetical protein PhCBS80983_g03683 [Powellomyces hirtus]	-2.06134	0.0351896
TRINITY_DN10289_c0_g2_i1	TYZ59825.1 hypothetical protein PybrP1_003482 [[Pythium] brassicae (nom. inval.)]	-2.06051	0.0310576
TRINITY_DN6159_c0_g3_i1	CAE7268466.1 CBF5 [Symbiodinium sp. KB8]	-2.05856	0.0468039
TRINITY_DN32599_c0_g1_i1	CAE7855304.1 RPL12 [Symbiodinium sp. KB8]	-2.05795	0.00368465
TRINITY_DN8909_c0_g1_i1	CAE7860733.1 cnot1, partial [Symbiodinium sp. KB8]	-2.05693	0.0283042
TRINITY_DN12487_c0_g1_i1	XP_004989279.1 palmitoyl-protein thioesterase 1 [Salpingoeca rosetta]	-2.05189	0.047982
TRINITY_DN3669_c0_g1_i1	CAE7473822.1 FIM5, partial [Symbiodinium sp. KB8]	-2.03532	0.00982322
TRINITY_DN1404_c0_g1_i1	CAE7305040.1 hppA1 [Symbiodinium sp. KB8]	-2.02731	0.00263153
TRINITY_DN21713_c0_g1_i1	CAE7280914.1 rps4 [Symbiodinium sp. KB8]	-2.02525	0.00931226
TRINITY_DN224_c0_g1_i1	KAA0148717.1 hypothetical protein FNF29_06499 [Cafeteria roenbergensis]	-2.02168	0.00022204
TRINITY_DN1454_c0_g3_i1	OQR82480.1 Rab5 family GTPase [Achlya hypogyna]	-2.02078	0.00720228
TRINITY_DN5444_c0_g1_i2	CAE7917869.1 GAMMACA1 [Symbiodinium sp. KB8]	-2.01988	0.0467684
TRINITY_DN5554_c0_g1_i1	MCI5106753.1 NADP-dependent isocitrate dehydrogenase [Pseudomonadales bacterium]	-2.01446	0.049195
TRINITY_DN47464_c0_g1_i1	PRP82916.1 putative 60S ribosomal protein L22 [Planoprotostelium fungivorum]	-2.01067	0.0262375
TRINITY_DN10_c0_g2_i1	KAA0153607.1 hypothetical protein FNF29_02995 [Cafeteria roenbergensis]	-2.01039	0.00975394
TRINITY_DN6240_c1_g1_i1	CAE7937959.1 unnamed protein product, partial [Symbiodinium sp. KB8]	-2.00665	0.0307358
TRINITY_DN55480_c0_g1_i1	CAE7387950.1 RPL34 [Symbiodinium sp. KB8]	-2.00034	0.0143694
TRINITY_DN1557_c0_g2_i1	CAE7273944.1 MDH2 [Symbiodinium sp. KB8]	-1.99959	0.0318694
TRINITY_DN2270_c0_g2_i1	CAE7405054.1 ACSL1 [Symbiodinium sp. KB8]	-1.99855	0.0168782
TRINITY_DN208_c0_g3_i1	RMX62399.1 hypothetical protein DD238_008154 [Peronospora effusa]	-1.99387	0.00202615
TRINITY_DN34768_c0_g1_i1	ACD65162.1 putative 60S ribosomal protein RPL10, partial [Phoronis muelleri]	-1.98937	0.00373358
TRINITY_DN6737_c0_g1_i1	KAF2075223.1 hypothetical protein CYY_003484 [Polysphondylium violaceum]	-1.98662	0.0474051
TRINITY_DN43093_c0_g1_i1	CAE7946930.1 RPL29A [Symbiodinium sp. KB8]	-1.985	0.0426485
TRINITY_DN20508_c0_g1_i1	CAE7221697.1 wos2 [Symbiodinium sp. KB8]	-1.98301	0.019964
TRINITY_DN1559_c0_g1_i1	CEP10789.1 hypothetical protein [Parasitella parasitica]	-1.98272	0.0317093
TRINITY_DN10869_c0_g1_i1	KAA0159359.1 hypothetical protein FNF28_05897 [Cafeteria roenbergensis]	-1.98114	0.0379532
TRINITY_DN6316_c0_g1_i1	CAE7215104.1 CTSA [Symbiodinium sp. KB8]	-1.97727	0.0466502
TRINITY_DN229_c0_g1_i1	CAE7668052.1 RPS20 [Symbiodinium sp. KB8]	-1.97537	0.0125376
TRINITY_DN8766_c0_g1_i1	KAA0151745.1 hypothetical protein FNF29_04429 [Cafeteria roenbergensis]	-1.96409	0.0379107
TRINITY_DN5599_c0_g1_i1	KAA0155434.1 hypothetical protein FNF29_01809 [Cafeteria roenbergensis]	-1.96246	0.0475351
TRINITY_DN1307_c0_g1_i1	CAE7208457.1 unnamed protein product [Symbiodinium sp. KB8]	-1.95269	0.0325198
TRINITY_DN245_c4_g1_i1	WP_201611859.1 2OG-Fe(II) oxygenase [Psychrobacter salsus]	-1.94747	0.0273851
TRINITY_DN2047_c0_g1_i2	PXF45639.1 hypothetical protein BWQ96_04543 [Gracilariopsis chorda]	-1.93887	0.00808126
TRINITY_DN31027_c0_g1_i1	CAE7799401.1 cdk5, partial [Symbiodinium sp. KB8]	-1.9379	0.0283042
TRINITY_DN594_c1_g2_i1	PXF48801.1 Inositol hexakisphosphate kinase 3 [Gracilariopsis chorda]	-1.93219	0.0212019
TRINITY_DN1719_c0_g1_i1	XP_003284789.1 histidine-tRNA ligase [Dictyostelium purpureum]	-1.93142	0.02559
TRINITY_DN1806_c0_g1_i2	CAE7894360.1 unnamed protein product, partial [Symbiodinium sp. KB8]	-1.92951	0.0302284
TRINITY_DN1995_c0_g1_i1	CAE7553979.1 ube2s-b [Symbiodinium sp. KB8]	-1.92411	0.0454303
TRINITY_DN11160_c0_g2_i1	KAH9493047.1 Dynein light chain 2, cytoplasmic [Bulinus truncatus]	-1.90126	0.0334633
TRINITY_DN38395_c0_g1_i1	CAE7357767.1 RPS21 [Symbiodinium sp. KB8]	-1.89882	0.0181853
TRINITY_DN48536_c0_g1_i1	CAE7409996.1 WBP4 [Symbiodinium sp. KB8]	-1.8977	0.0416231
TRINITY_DN1417_c0_g4_i1	CAE7853185.1 RPS5 [Symbiodinium sp. KB8]	-1.89709	0.0219204
TRINITY_DN1855_c0_g1_i1	KAA0148044.1 hypothetical protein FNF29_06987 [Cafeteria roenbergensis]	-1.88725	0.0259597
TRINITY_DN55773_c0_g1_i1	CAE7405001.1 unnamed protein product, partial [Symbiodinium sp. KB8]	-1.88694	0.0481909
TRINITY_DN5177_c0_g1_i2	PXF41646.1 putative RNA pseudouridine synthase [Gracilariopsis chorda]	-1.88095	0.0300773
TRINITY_DN9154_c0_g1_i1	CAE7667950.1 Usp4, partial [Symbiodinium sp. KB8]	-1.87222	0.0485236
TRINITY_DN47071_c0_g1_i1	CAE7897394.1 RPL11B, partial [Symbiodinium sp. KB8]	-1.84228	0.0126667
TRINITY_DN32754_c0_g1_i1	VEU40423.1 unnamed protein product [Pseudo-nitzschia multistriata]	-1.83543	0.0379107
TRINITY_DN7792_c0_g1_i1	KAA0154745.1 hypothetical protein FNF29_02274 [Cafeteria roenbergensis]	-1.83094	0.0365558
TRINITY_DN681_c0_g1_i10	GBG32602.1 Ubiquitin [Hondaea fermentalgiana]	-1.81468	0.00913971
TRINITY_DN1745_c0_g1_i1	PXF43018.1 hypothetical protein BWQ96_07266 [Gracilariopsis chorda]	-1.80764	0.0471101
TRINITY_DN642_c3_g1_i1	PXF42258.1 G2/mitotic-specific cyclin-2 [Gracilariopsis chorda]	-1.80584	0.0429778
TRINITY_DN1277_c0_g1_i1	CAE7554825.1 RPL18C [Symbiodinium sp. KB8]	-1.80553	0.0470878
TRINITY_DN59098_c0_g1_i1	CAE7283838.1 rpl9 [Symbiodinium sp. KB8]	-1.79558	0.0230165
TRINITY_DN5948_c2_g1_i1	PXF39959.1 hypothetical protein BWQ96_10331 [Gracilariopsis chorda]	-1.79312	0.00655972
TRINITY_DN31835_c0_g1_i1	CAE7262211.1 snu13 [Symbiodinium sp. KB8]	-1.77503	0.0454303
TRINITY_DN29558_c0_g1_i1	CAE6951515.1 Skp1 [Symbiodinium sp. CCMP2456]	-1.77357	0.0355317
TRINITY_DN167_c0_g2_i1	CAE7694817.1 unnamed protein product, partial [Symbiodinium sp. KB8]	-1.76115	0.0155134
TRINITY_DN40093_c0_g1_i1	CAE7221284.1 RPS9B [Symbiodinium sp. KB8]	-1.71199	0.0289661
TRINITY_DN235_c0_g1_i2	XP_005830145.1 hypothetical protein GUITHDRAFT_110892 [Guillardia theta CCMP2712]	-1.70102	0.0493246
TRINITY_DN64851_c0_g1_i1	CAE7334079.1 14-3-3epsilon [Symbiodinium sp. KB8]	-1.68871	0.032593
TRINITY_DN7636_c1_g1_i1	PXF39658.1 hypothetical protein BWQ96_10641 [Gracilariopsis chorda]	-1.63427	0.00655972
TRINITY_DN794_c0_g1_i1	KAI0566319.1 hypothetical protein FGB62_10g11 [Gracilaria domingensis]	-1.59291	0.000304835
TRINITY_DN65589_c0_g1_i1	CAE7414921.1 unnamed protein product [Symbiodinium sp. KB8]	-1.5811	0.0456729
TRINITY_DN6939_c0_g1_i2	OQR99531.1 hypothetical protein ACHHYP_05889 [Achlya hypogyna]	-1.56383	0.045334
TRINITY_DN23243_c0_g1_i1	CAE7578846.1 unnamed protein product [Symbiodinium sp. KB8]	-1.49632	0.0405091
TRINITY_DN764_c0_g1_i2	PXF48661.1 Temptin [Gracilariopsis chorda]	-1.45338	0.0427736
TRINITY_DN1625_c0_g1_i9	KAI3635909.1 hypothetical protein MIR68_006547, partial [Amoeboaphelidium protococcarum]	-1.39734	0.0302284
TRINITY_DN2527_c1_g1_i1	XP_019562307.1 uncharacterized protein LOC109430683 [Aedes albopictus]	-1.38048	0.0377699
TRINITY_DN1750_c1_g1_i1	KAI0567173.1 bZIP transcription factor [Gracilaria domingensis]	-1.34547	0.000261041
TRINITY_DN1381_c0_g1_i1	OUT19854.1 hypothetical protein CAS74_005127 [Pichia kudriavzevii]	-1.3229	0.0453771
TRINITY_DN1161_c0_g1_i1	PXF49172.1 Mite allergen Der p 3 [Gracilariopsis chorda]	-1.26445	0.0283042
TRINITY_DN355_c0_g1_i3	PXF49450.1 hypothetical protein BWQ96_00766 [Gracilariopsis chorda]	-1.22929	0.0358155
TRINITY_DN2141_c0_g1_i1	PXF40756.1 Thioredoxin [Gracilariopsis chorda]	-1.1229	0.000338048
TRINITY_DN58351_c0_g1_i1	PXF42263.1 hypothetical protein BWQ96_07982 [Gracilariopsis chorda]	-1.11681	0.024463
TRINITY_DN41500_c0_g1_i1	PXF46937.1 Serine/threonine-protein kinase STN7, chloroplastic [Gracilariopsis chorda]	-1.07859	0.0485236
TRINITY_DN24062_c0_g1_i1	PXF45455.1 putative E3 ubiquitin-protein ligase HIP1 [Gracilariopsis chorda]	-1.0591	0.0384625
TRINITY_DN1060_c0_g1_i8	XP_005716185.1 unnamed protein product [Chondrus crispus]	-1.05252	0.0195174
